# Supplementary material for: Associations between Urinary and Dietary Selenium and Blood Metabolic Parameters in a Healthy Northern Italy Population
Source: MDPI journal article supplement (doi:10.3390/antiox10081193), 2021-07-26

## Supplemental Material

**Table S1.** Linear regression analysis of glycaemia, lipid profile variables and TSH versus urinary selenium (Se) excretion and dietary selenium biomarkers as independent variables for the male population (n=62). Crude model and adjusted for age, body mass index (BMI), cotinine levels, and alcohol intake along with their 95% confidence interval (CI).

|                                        | Crude    |                | Adjusted |                |
|----------------------------------------|----------|----------------|----------|----------------|
| <b>Urinary Se concentration (µg/L)</b> | <b>β</b> | <b>95% CI</b>  | <b>β</b> | <b>95% CI</b>  |
| Glycemia (mg/dL)                       | 0.05     | (-0.10, 0.19)  | 0.07     | (-0.06, 0.19)  |
| Total cholesterol (mg/dL)              | 0.12     | (-0.38, 0.62)  | 0.21     | (-0.30, 0.71)  |
| HDL-cholesterol (mg/dL)                | -0.10    | (-0.26, 0.07)  | -0.09    | (-0.25, 0.06)  |
| LDL-cholesterol (mg/dL)                | 0.13     | (-0.35, 0.60)  | 0.17     | (-0.32, 0.66)  |
| Triglycerides (mg/dL)                  | 0.38     | (-0.49, 1.24)  | 0.53     | (-0.34, 1.39)  |
| Thyroid-stimulating hormone (mU/mL)    | 0.01     | (-0.001, 0.03) | 0.01     | (-0.01, 0.03)  |
| <b>Dietary Se intake (µg/day)</b>      | <b>β</b> | <b>95% CI</b>  | <b>β</b> | <b>95% CI</b>  |
| Glycemia (mg/dL)                       | 0.02     | (-0.07, 0.10)  | 0.01     | (-0.06, 0.08)  |
| Total cholesterol (mg/dL)              | -0.21    | (-0.50, 0.07)  | -0.22    | (-0.51, 0.06)  |
| HDL-cholesterol (mg/dL)                | -0.01    | (-0.11, 0.08)  | -0.02    | (-0.10, 0.07)  |
| LDL-cholesterol (mg/dL)                | -0.14    | (-0.42, 0.13)  | -0.15    | (-0.43, 0.13)  |
| Triglycerides (mg/dL)                  | -0.25    | (-0.75, 0.25)  | -0.27    | (-0.77, 0.23)  |
| Thyroid-stimulating hormone (mU/mL)    | -0.004   | (-0.01, 0.004) | -0.004   | (-0.01, 0.004) |

**Table S2.** Linear regression analysis of glycaemia, lipid profile variables and TSH versus urinary selenium (Se) excretion and dietary selenium biomarkers as independent variables for the female population (n=75). Crude model and adjusted for age, body mass index (BMI), cotinine levels, and alcohol intake along with their 95% confidence interval (CI).

|                                        | Crude    |                 | Adjusted |                 |
|----------------------------------------|----------|-----------------|----------|-----------------|
| <b>Urinary Se concentration (µg/L)</b> | <b>β</b> | <b>95% CI</b>   | <b>β</b> | <b>95% CI</b>   |
| Glycemia (mg/dL)                       | 0.09     | (-0.02, 0.21)   | 0.09     | (-0.03, 0.21)   |
| Total cholesterol (mg/dL)              | -0.23    | (-0.66, 0.20)   | -0.23    | (-0.66, 0.21)   |
| HDL-cholesterol (mg/dL)                | -0.17    | (-0.37, 0.04)   | -0.16    | (-0.36, 0.04)   |
| LDL-cholesterol (mg/dL)                | -0.04    | (-0.40, 0.31)   | -0.03    | (-0.39, 0.33)   |
| Triglycerides (mg/dL)                  | -0.24    | (-0.80, 0.33)   | -0.24    | (-0.80, 0.33)   |
| Thyroid-stimulating hormone (mU/mL)    | -0.003   | (-0.02, 0.01)   | -0.0002  | (-0.01, 0.01)   |
| <b>Dietary Se intake (µg/day)</b>      | <b>β</b> | <b>95% CI</b>   | <b>β</b> | <b>95% CI</b>   |
| Glycemia (mg/dL)                       | 0.05     | (-0.01, 0.10)   | 0.04     | (-0.02, 0.10)   |
| Total cholesterol (mg/dL)              | -0.18    | (-0.39, 0.03)   | -0.17    | (-0.39, 0.04)   |
| HDL-cholesterol (mg/dL)                | -0.04    | (-0.15, 0.06)   | -0.02    | (-0.12, 0.08)   |
| LDL-cholesterol (mg/dL)                | -0.08    | (-0.26, 0.09)   | -0.07    | (-0.25, 0.10)   |
| Triglycerides (mg/dL)                  | -0.21    | (-0.51, 0.08)   | -0.30    | (-0.57, -0.03)  |
| Thyroid-stimulating hormone (mU/mL)    | 0.001    | (-0.006, 0.007) | 0.001    | (-0.006, 0.008) |

**Abbreviations:** HDL, high-density lipoprotein; LDL, low-density lipoprotein; TSH, thyroid-stimulating hormone

**Figure S1.** Spline regression analysis of urinary and dietary Se levels. Solid line represents crude analysis with upper and lower confidence interval limits.

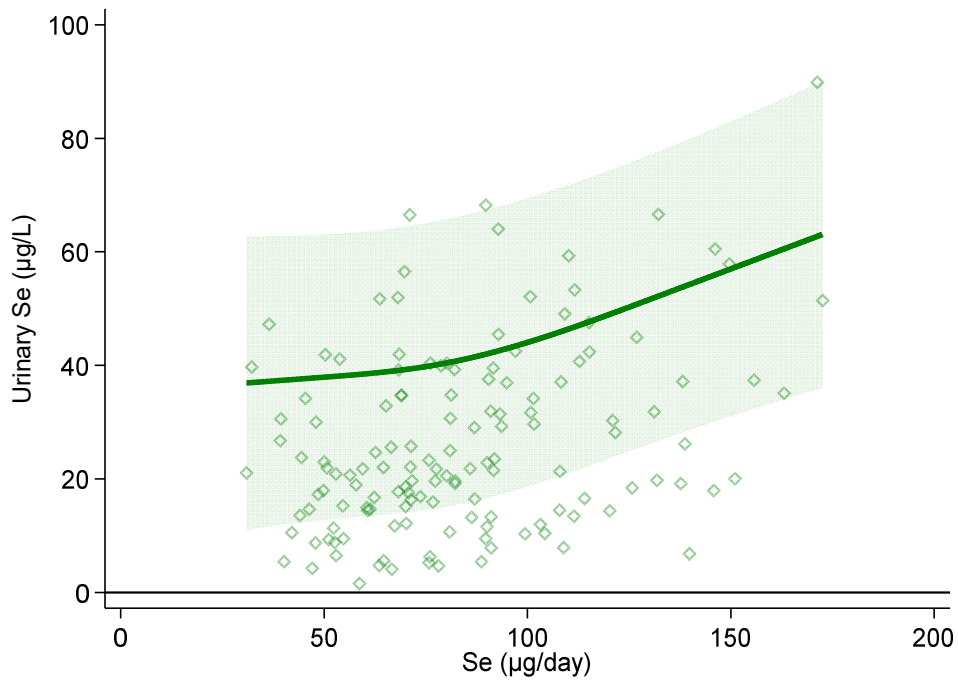

**Figure S2.** Spline regression analysis of urinary Se levels and glycemic, lipid profile variables and thyroid-stimulating hormone (TSH) in males (n=62). Solid lines represent multivariable analysis (adjusted for age, body mass index, cotinine levels, and alcohol intake) with upper and lower confidence interval limits.

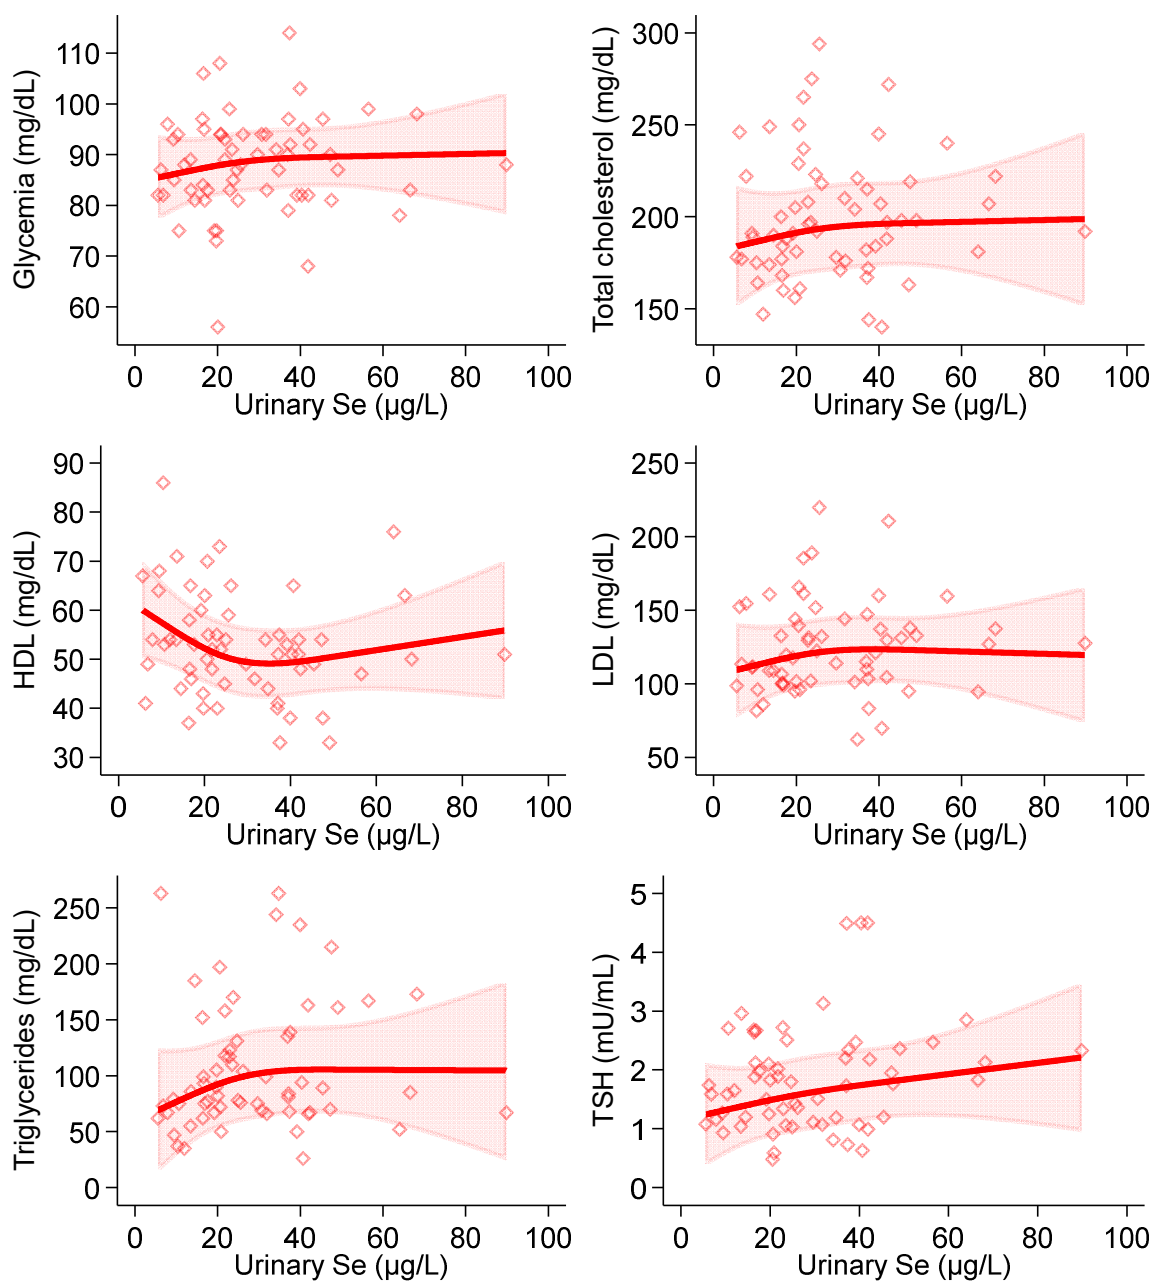

**Figure S3.** Spline regression analysis of urinary Se levels and glycemic, lipid profile variables and thyroid-stimulating hormone (TSH) in females (n=75). Solid lines represent multivariable analysis (adjusted for age, body mass index, cotinine levels, and alcohol intake) with upper and lower confidence interval limits.

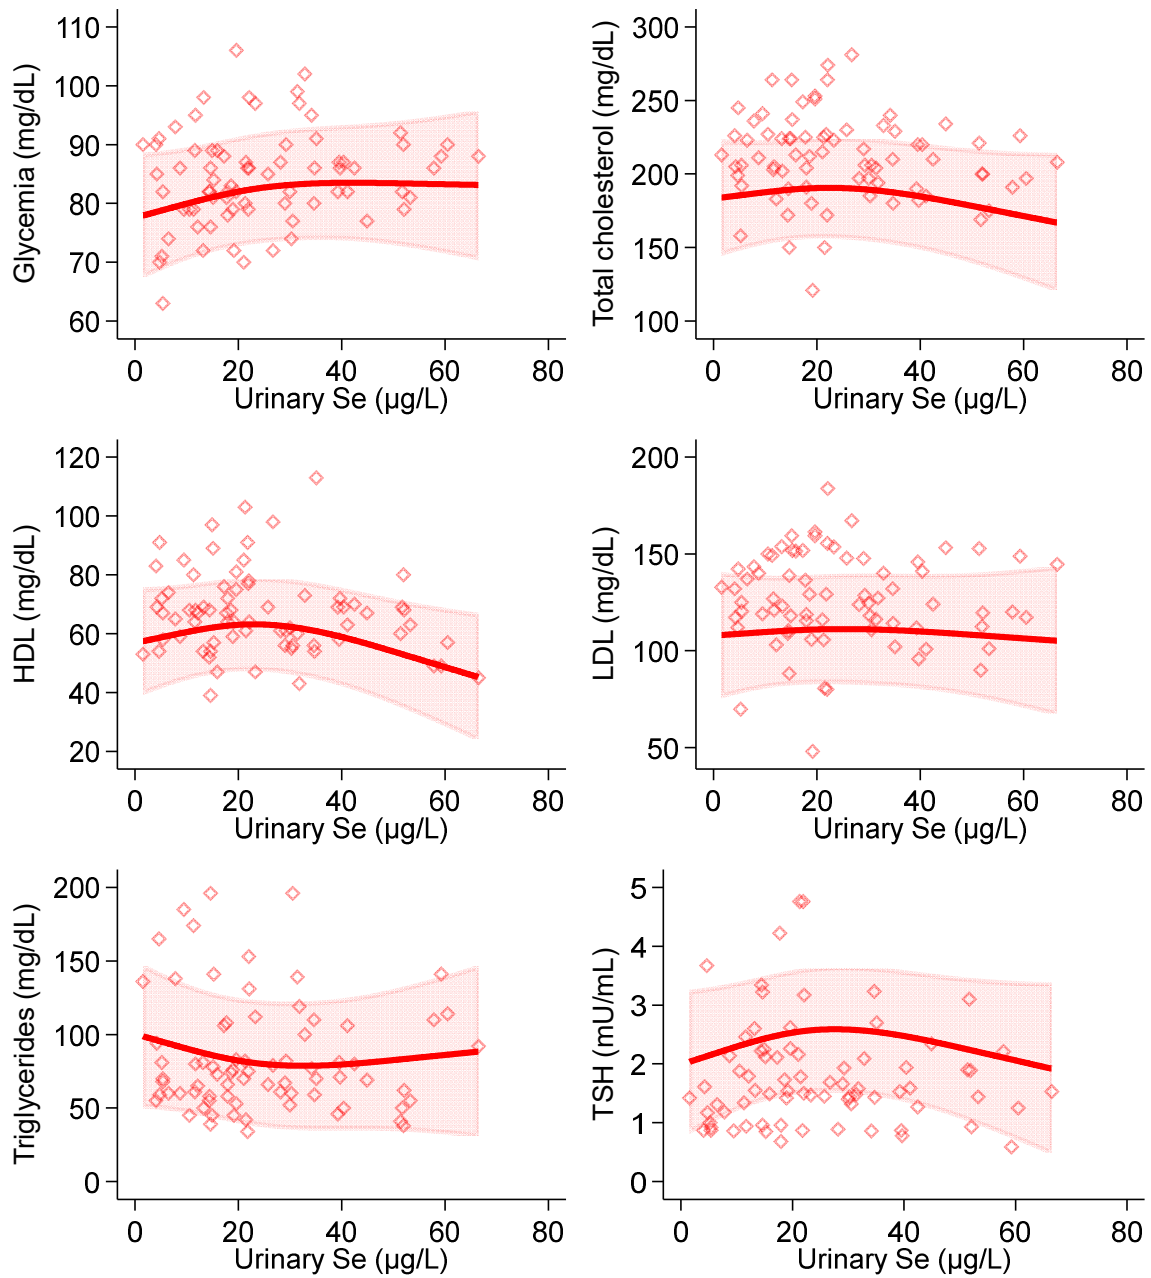

**Figure S4.** Spline regression analysis of dietary Se levels and glycemic, lipid profile variables and thyroid-stimulating hormone (TSH) in males (n=62). Solid lines represent multivariable analysis (adjusted for age, body mass index, cotinine levels, and alcohol intake) with upper and lower confidence interval limits.

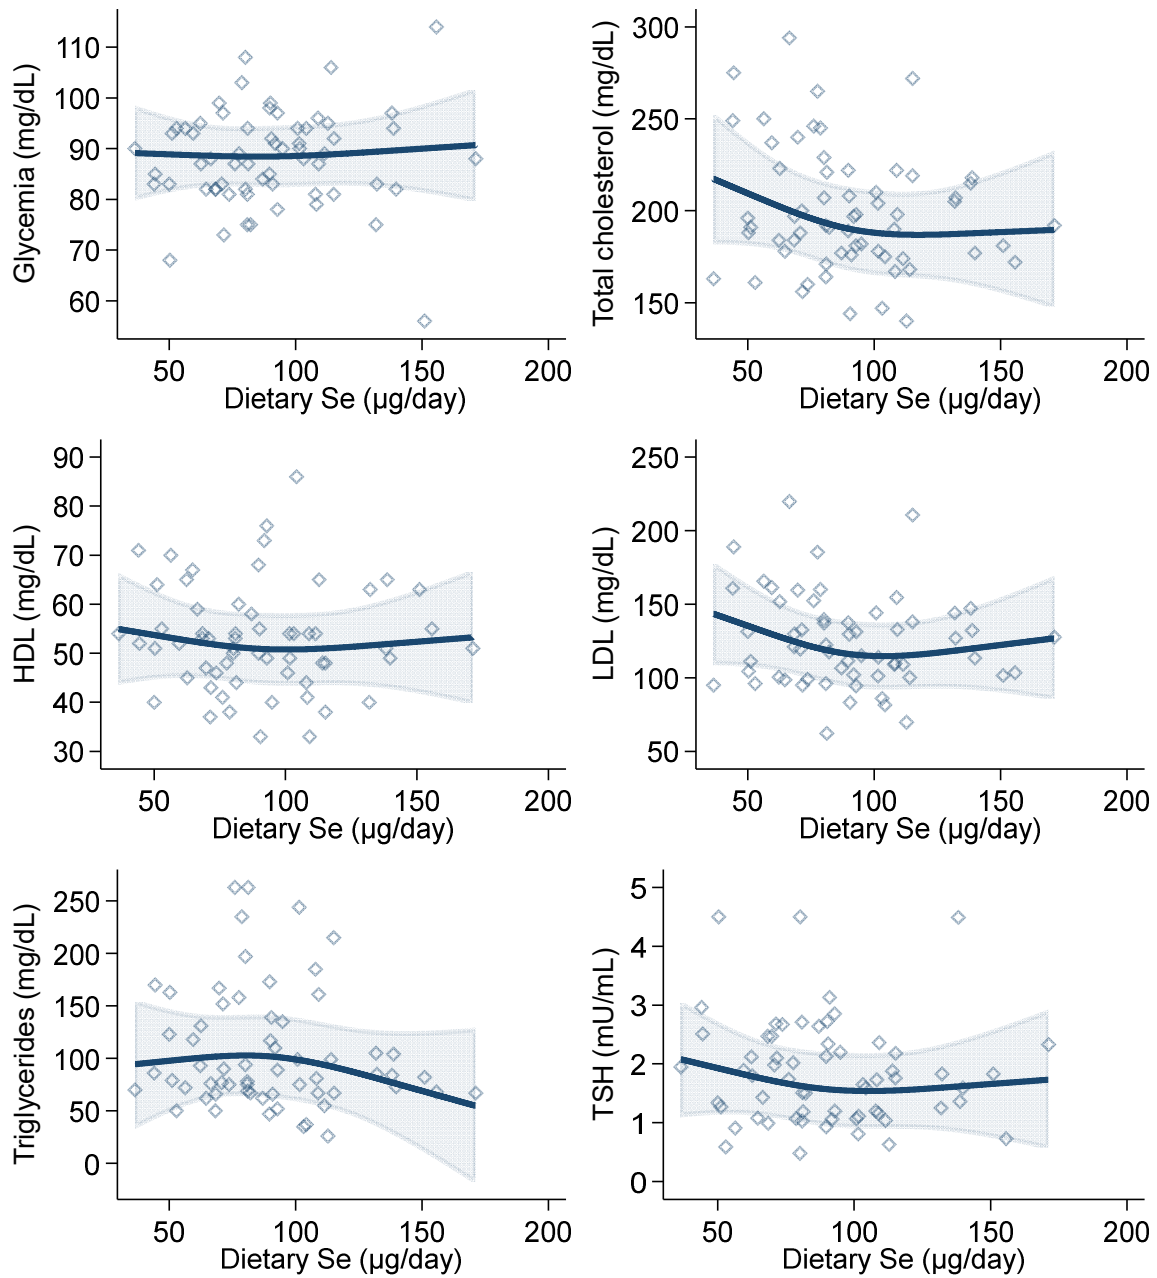

**Figure S5.** Spline regression analysis of dietary Se levels and glycemic, lipid profile variables and thyroid-stimulating hormone (TSH) in females (n=75). Solid lines represent multivariable analysis (adjusted for age, body mass index, cotinine levels, and alcohol intake) with upper and lower confidence interval limits.

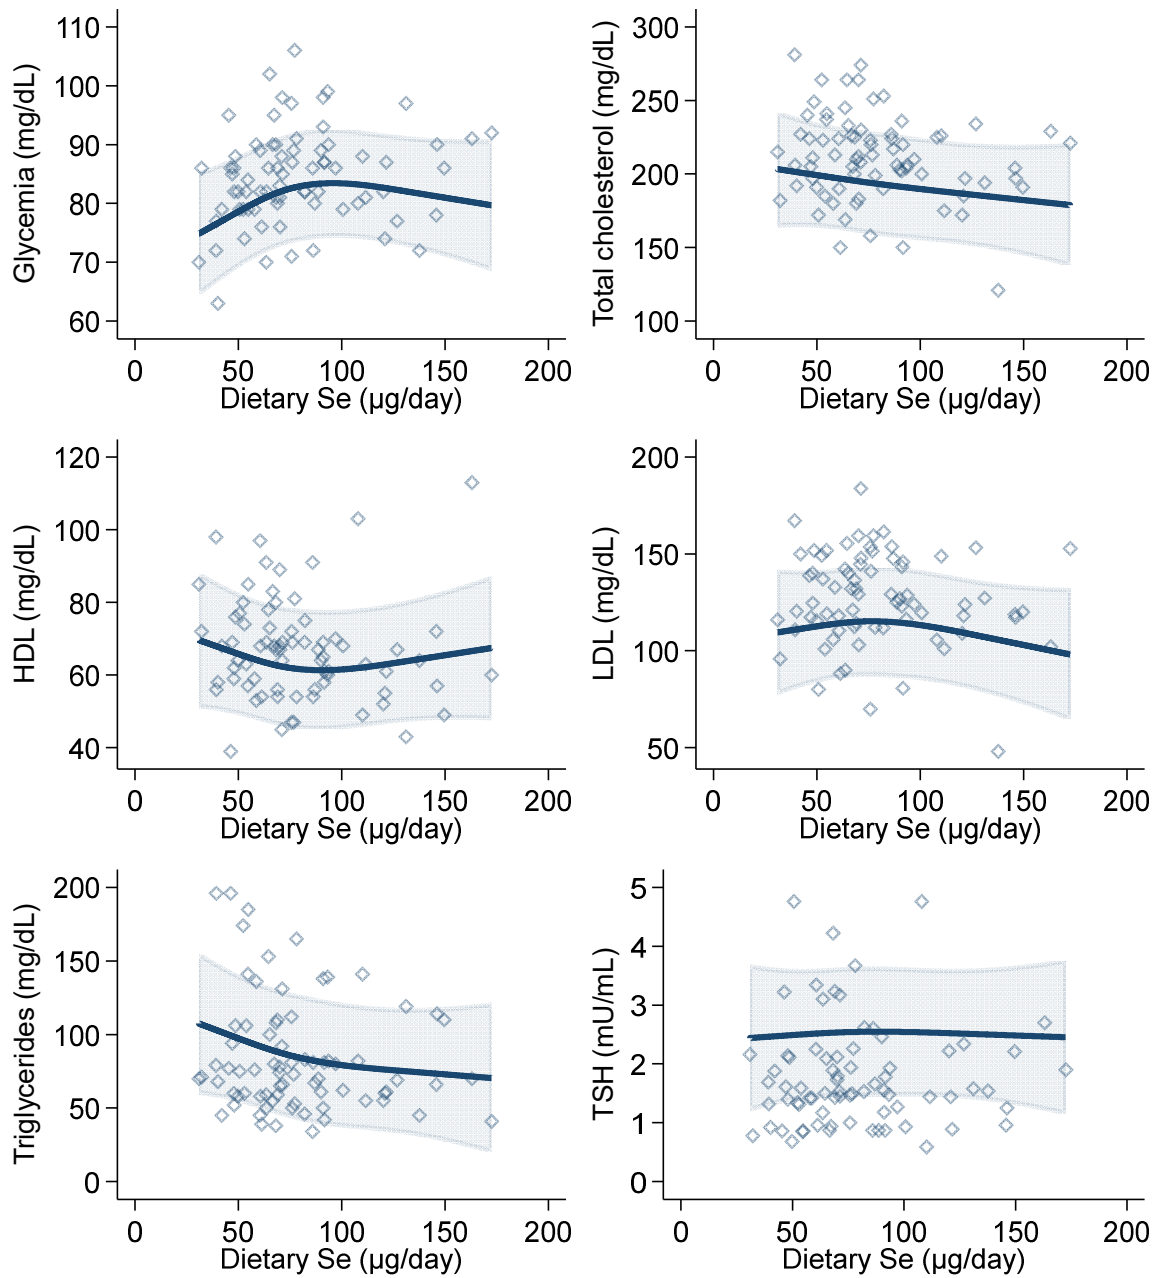

Supplement: s1 [file s1]
